# Supplementary material
Source: Springer Nature journal article supplement (https://www.springermedizin.de/resource/supplementary/12889_2011_3776_MOESM5_ESM.pdf/9491292)

## Aborigine

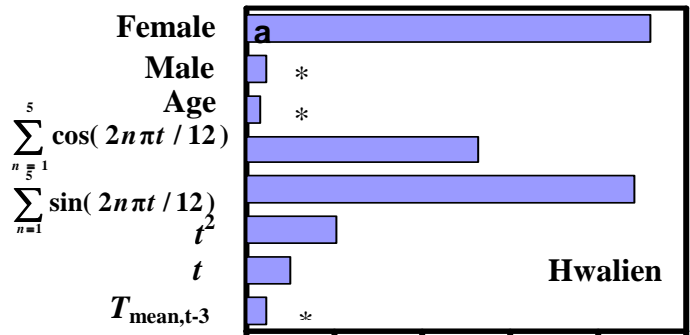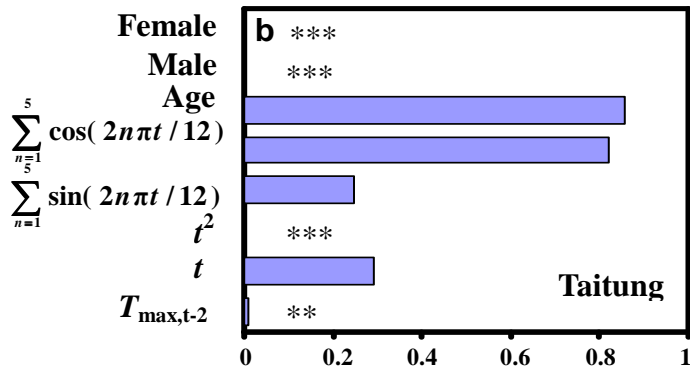

## Gender

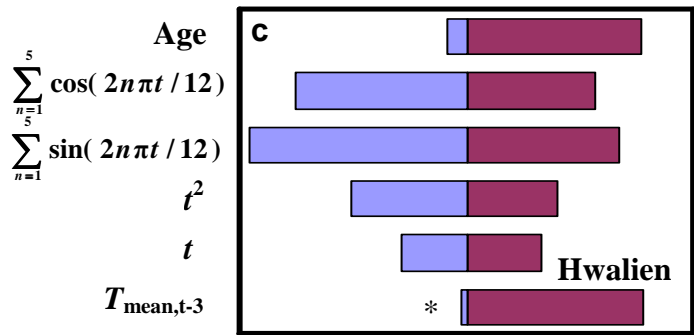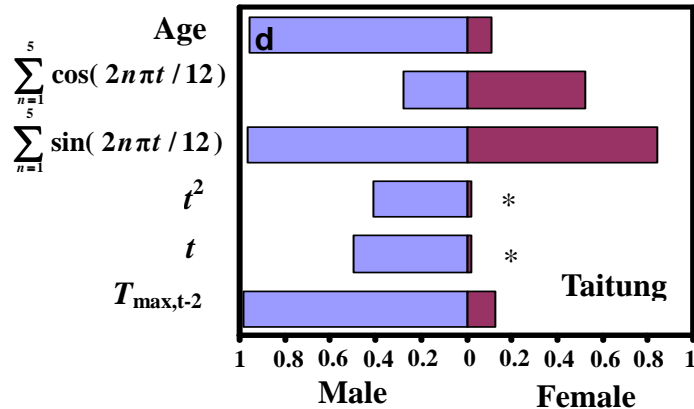

*p*-value

Supplement: MOESM5 [file 9491292]
